# Supplementary material for: Predicting disease associations via biological network analysis
Source: PubMed Central journal article supplement (PMC4174675; doi:10.1186/1471-2105-15-304), 2014-09-17
Supplement: 12859_2013_6584_MOESM1_ESM.pdf [file 12859_2013_6584_MOESM1_ESM.pdf]

# Supplementary Information

Kai Sun, Joana Gonçalves, Chris Larminie, and Nataša Pržulj

## 1. Supplementary Figures

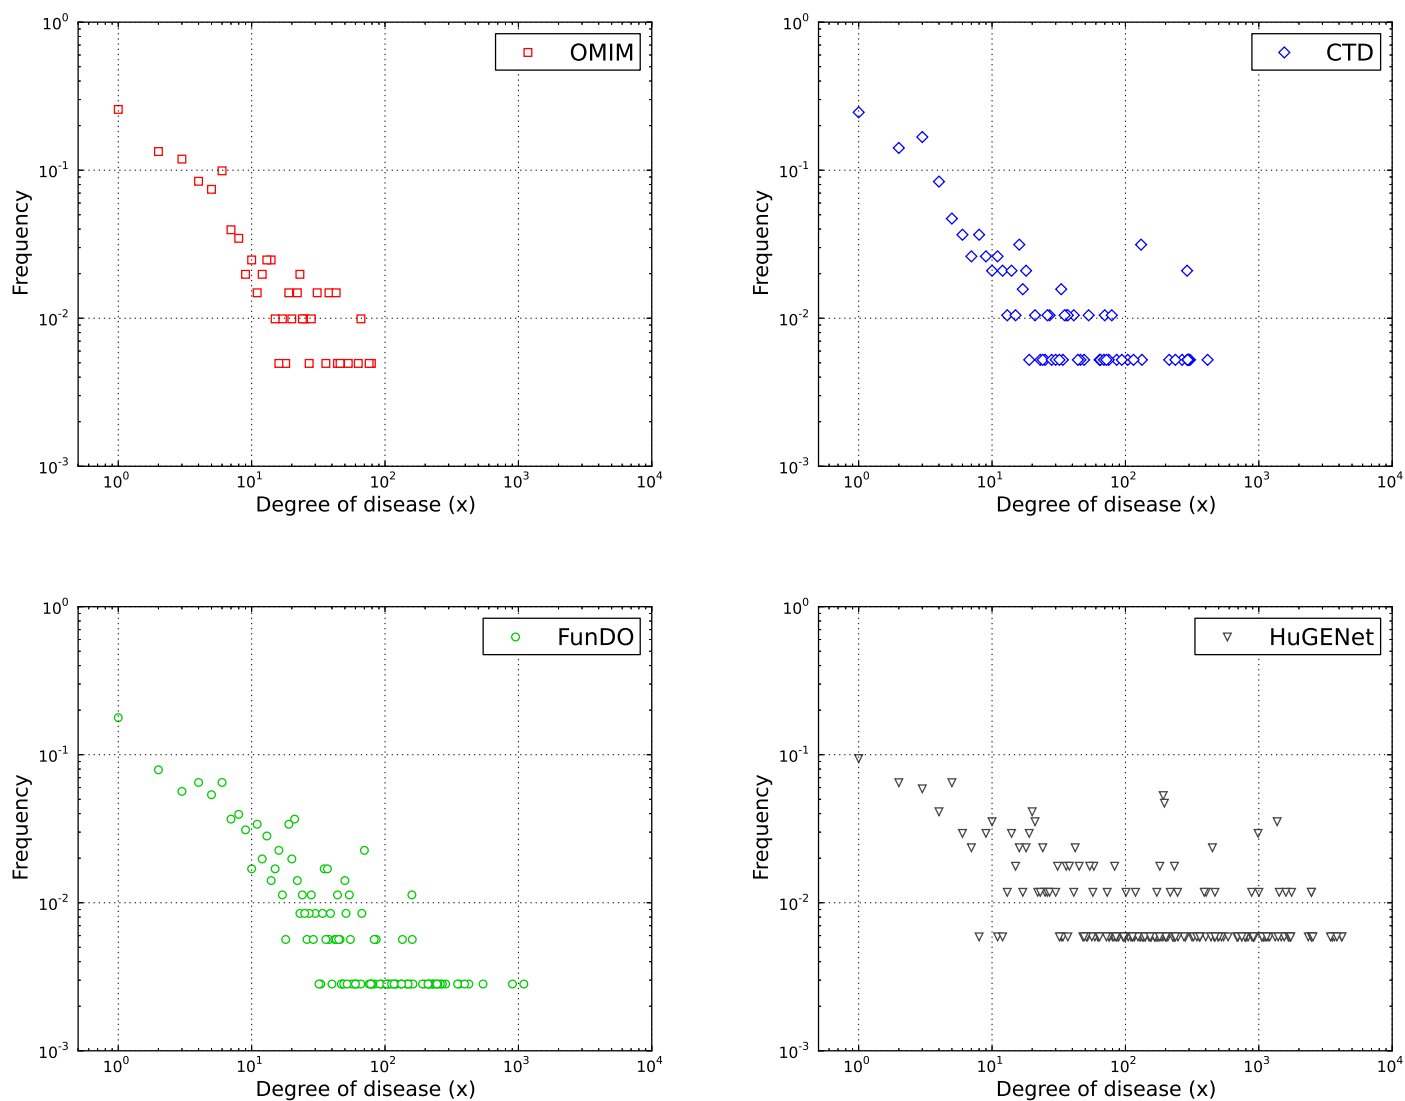

Figure S1: Degree distributions of diseases of the four disease-gene association datasets we analysed.

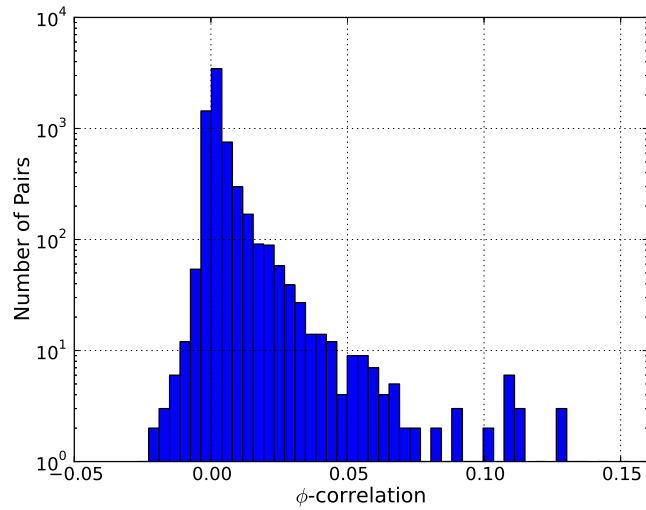

Figure S2: The distribution of  $\phi$ -correlation scores.

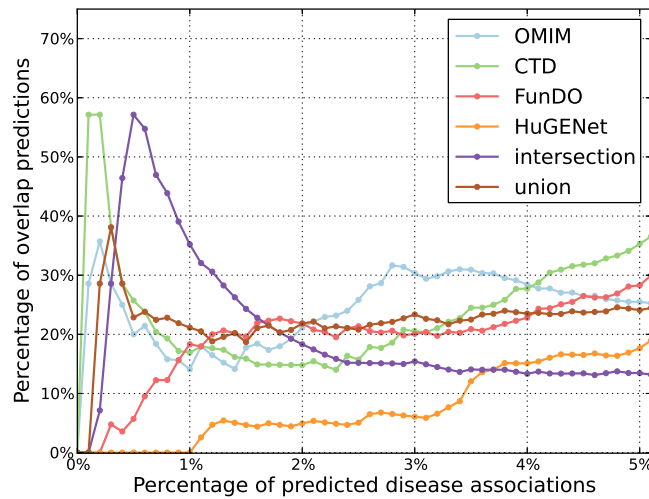

Figure S3: The overlap of predictions. The x-axis shows the percentage of predicted associations in all disease pairs we analysed, and the y-axis shows the percentage of overlap among associations predicted by the three similarity measures.

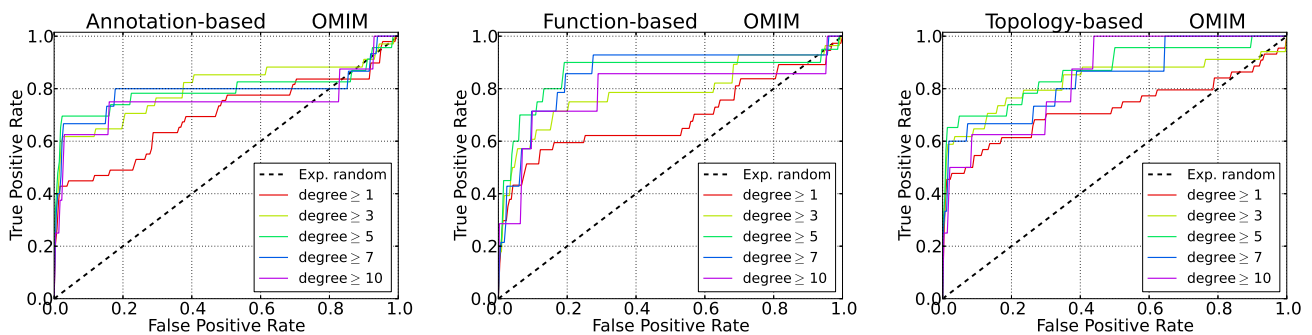

Figure S4: ROC curves obtained by evaluating the three disease similarity measures against comorbidity. OMIM (downloaded in June 2014) was used as the disease-gene association dataset. The PPI data obtained from BioGRID version 3.2.112 was used to compute the topology-based similarity scores. The  $\phi$ -correlation threshold was set to 0.06. For each similarity measure, we evaluated diseases annotated with at least 1, 3, 5, 7, 10, 15 genes, showing by curves with different colours in each plot.

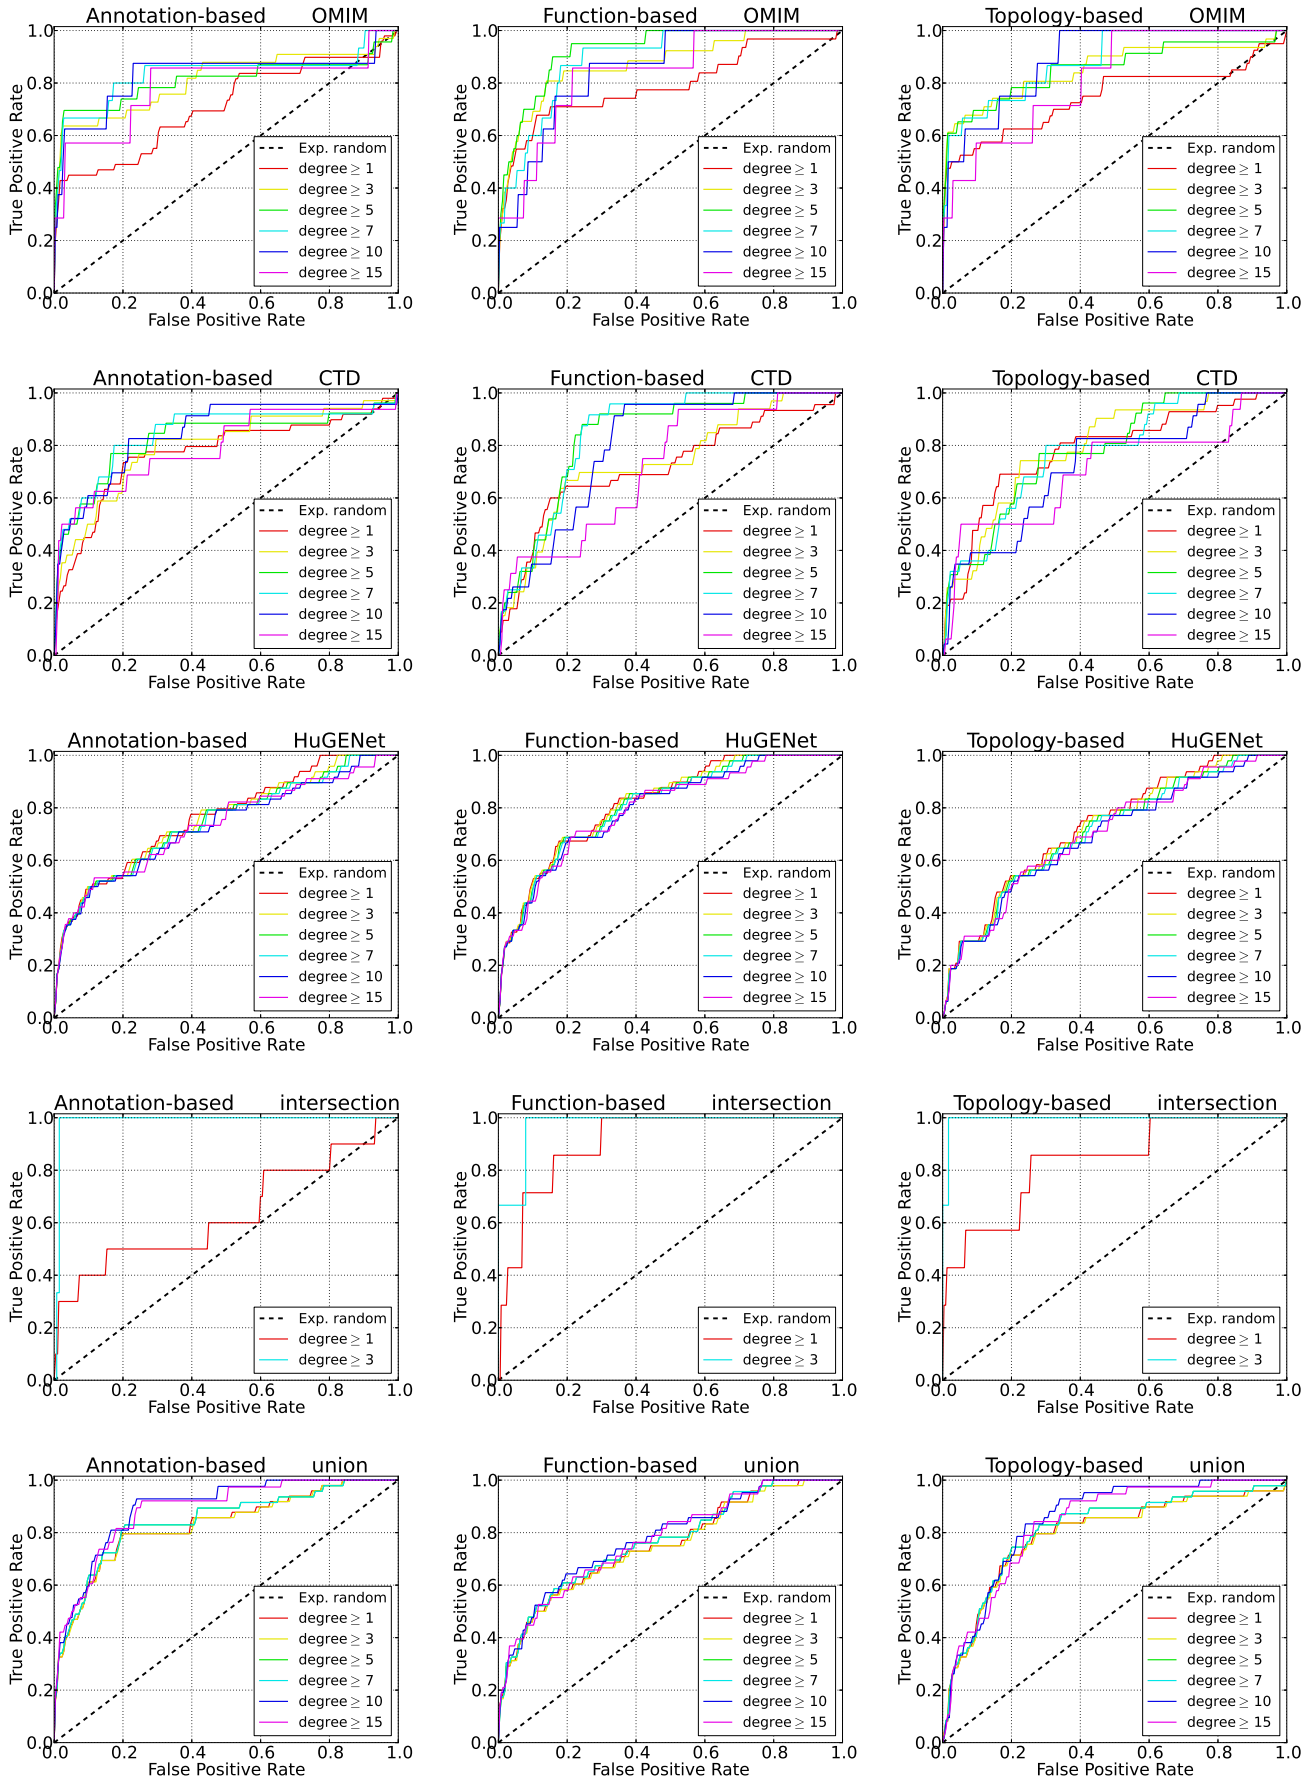

Figure S5: ROC curves obtained by evaluating the three disease similarity measures against comorbidity. The  $\phi$ -correlation threshold was set to 0.06. For each combination of disease-gene association data and disease similarity measure, we evaluated diseases annotated with at least 1, 3, 5, 7, 10, 15 genes, showing by curves with different colours in each plot. For the intersection set, only two curves were shown in each plot since there were no comorbidity relationships between diseases annotated with more than 5 genes.

## 2. Supplementary Table

| PPI Data                                            | Nodes  | Edges  |
|-----------------------------------------------------|--------|--------|
| BioGRID version 2.0.56 (released in September 2009) | 6,098  | 18,744 |
| BioGRID version 3.0.68 (released in September 2010) | 8,433  | 29,971 |
| BioGRID version 3.1.80 (released in September 2011) | 9,056  | 37,640 |
| BioGRID version 3.1.93 (released in October 2012)   | 11,261 | 66,253 |

Table S1: PPI data obtained from different versions of BioGRID database.

| Data         | Version 2.0.56      | Version 3.0.68      | Version 3.1.80      | Version 3.1.93      |
|--------------|---------------------|---------------------|---------------------|---------------------|
| OMIM         | 0.7222 $\pm$ 0.0009 | 0.7431 $\pm$ 0.0008 | 0.7262 $\pm$ 0.0007 | 0.8495 $\pm$ 0.0011 |
| CTD          | 0.7669 $\pm$ 0.0033 | 0.7524 $\pm$ 0.0034 | 0.7569 $\pm$ 0.0041 | 0.7949 $\pm$ 0.0042 |
| FunDO        | 0.7451 $\pm$ 0.0028 | 0.7401 $\pm$ 0.0022 | 0.7274 $\pm$ 0.0026 | 0.7497 $\pm$ 0.0016 |
| HuGENet      | 0.6853 $\pm$ 0.0015 | 0.6965 $\pm$ 0.0021 | 0.7099 $\pm$ 0.0017 | 0.7153 $\pm$ 0.0015 |
| Intersection | 0.9993 $\pm$ 0.0045 | 0.9965 $\pm$ 0.0034 | 0.9962 $\pm$ 0.0039 | 0.9958 $\pm$ 0.0041 |
| Union        | 0.7605 $\pm$ 0.0027 | 0.7685 $\pm$ 0.0020 | 0.7688 $\pm$ 0.0021 | 0.7939 $\pm$ 0.0022 |

Table S2: AUC values obtained by evaluating the topology-based similarity measure against comorbidity, using PPI data obtained from different versions of BioGRID database. The  $\phi$ -correlation threshold was set to 0.06 and all diseases annotated with least 3 genes were evaluated. Each evaluation test was run 30 times to compute the statistics reported in the table.

|         | ShareSig            | AllSig              |
|---------|---------------------|---------------------|
| OMIM    | 0.6657 $\pm$ 0.0369 | 0.8449 $\pm$ 0.0019 |
| CTD     | 0.6452 $\pm$ 0.0369 | 0.7785 $\pm$ 0.0089 |
| FunDO   | 0.7485 $\pm$ 0.0168 | 0.6480 $\pm$ 0.0161 |
| HuGENet | 0.7154 $\pm$ 0.0028 | 0.5654 $\pm$ 0.0416 |

Table S3: Evaluation of the topology-based similarity against comorbidity. AUC values were obtained by using *AllSig* and *ShareSig* as the topology-based similarity scores.

| Rank | Code       | Disease name                                                      | $\phi$ -correlation | GWAS | Score           | Reference                |
|------|------------|-------------------------------------------------------------------|---------------------|------|-----------------|--------------------------|
| 1    | 239        | Neoplasms of unspecified nature                                   | 0.0029              | –    | 0.9917 (99.98%) | PMID: 23639840           |
| 2    | 155        | Malignant neoplasm of liver and intrahepatic bile ducts           | 0.0047              | 1    | 0.9881 (99.87%) | GWAS                     |
| 3    | 710        | Diffuse diseases of connective tissue                             | -0.0019             | 1    | 0.9872 (99.76%) | GWAS                     |
| 4    | 714        | Rheumatoid arthritis and other inflammatory polyarthropathies     | -0.0098             | 8    | 0.9867 (99.61%) | GWAS                     |
| 5    | <b>256</b> | Ovarian dysfunction                                               | 0.0001              | 4    | 0.9850 (99.56%) | ICD-9, GWAS              |
| 5    | <b>278</b> | Overweight, obesity and other hyperalimentation                   | <b>0.0833</b>       | 3    | 0.9850 (99.56%) | ICD-9, comorbidity, GWAS |
| 7    | 401        | Essential hypertension                                            | <b>0.1275</b>       | 0    | 0.9845 (99.55%) | Comorbidity              |
| 8    | 295        | Schizophrenic disorders                                           | 0.0069              | 0    | 0.9819 (99.32%) | PMID: 17474808           |
| 9    | 282        | Hereditary hemolytic anemias                                      | 0.0060              | 1    | 0.9818 (99.25%) | GWAS                     |
| 10   | 289        | Other diseases of blood and blood-forming organs                  | 0.0005              | –    | 0.9811(99.24%)  | PMID: 11727971           |
| 11   | 642        | Hypertension complicating pregnancy childbirth and the puerperium | 0.0006              | –    | 0.9795 (99.17%) | PMID: 18558027           |
| 12   | 365        | Glaucoma                                                          | 0.0150              | 1    | 0.9779 (98.91%) | GWAS                     |
| 13   | 135        | Sarcoidosis                                                       | 0.0048              | 0    | 0.9778 (98.91%) | PMID: 23075651           |
| 13   | 414        | Other forms of chronic ischemic heart disease                     | <b>0.1106</b>       | 3    | 0.9778 (98.91%) | Comorbidity, GWAS        |
| 15   | 331        | Other cerebral degenerations                                      | -0.0038             | 0    | 0.9740 (98.63%) | PMID: 20837967           |
| 15   | 332        | Parkinson’s disease                                               | -0.0032             | 0    | 0.9740 (98.63%) | PMID: 23335160           |
| 17   | <b>244</b> | Acquired hypothyroidism                                           | 0.0193              | 0    | 0.9730 (98.61%) | ICD-9                    |
| 18   | 335        | Anterior horn cell disease                                        | 0.0008              | 0    | 0.9720 (98.47%) | PMID: 22017321           |
| 19   | 362        | Other retinal disorders                                           | <b>0.0853</b>       | 0    | 0.9716 (98.46%) | Comorbidity              |
| 20   | 753        | Congenital anomalies of urinary system                            | -0.0026             | –    | 0.9714 (98.42%) | PMID: 22260488           |
| 21   | <b>277</b> | Other and unspecified disorders of metabolism                     | 0.0003              | 0    | 0.9708 (98.39%) | ICD-9                    |
| 22   | 286        | Coagulation defects                                               | 0.0076              | –    | 0.9679 (98.26%) | PMID: 22460041           |
| 23   | 042        | Human immunodeficiency virus [HIV] disease                        | -0.0003             | 0    | 0.9678 (98.24%) | PMID: 19419710           |
| 24   | 340        | Multiple sclerosis                                                | -0.0040             | 5    | 0.9649 (98.00%) | GWAS                     |
| 24   | 579        | Intestinal malabsorption                                          | 0.0015              | 7    | 0.9649 (98.00%) | GWAS                     |
| 26   | <b>272</b> | Disorders of lipid metabolism                                     | 0.0342              | –    | 0.9644 (97.79%) | ICD-9                    |
| 27   | 577        | Diseases of pancreas                                              | 0.0079              | 0    | 0.9643 (97.78%) | PMID: 22996690           |
| 28   | 287        | Purpura and other hemorrhagic conditions                          | 0.0132              | –    | 0.9636 (97.60%) | PMID: 21092704           |
| 28   | 290        | Dementias                                                         | 0.0034              | 0    | 0.9636 (97.60%) | PMID: 23543134           |
| 28   | 581        | Nephrotic syndrome                                                | 0.0544              | –    | 0.9636 (97.60%) | PMID: 16995591           |

Table S4: List of the top 30 diseases associated with DM. The similarity scores (the 6<sup>th</sup> column, denoted by ‘Score’) were computed by using the topology-based measure and FunDO was used as the source of disease-gene associations. Only diseases annotated in all four disease-gene association datasets are listed in the table. For a disease associated with DM according to ICD-9, we highlighted its ICD-9 code (the 2<sup>nd</sup> column, denoted by ‘Code’) in bold and added ‘ICD-9’ to the reference (the last column). For a disease associated with DM according to comorbidity, we highlighted the  $\phi$ -correlation score in bold and added ‘comorbidity’ to the reference. For each disease, we listed the number of genes it shared with DM according to GWAS data in the 5<sup>th</sup> column (‘-’ indicates no significant associations were reported in GWAS data for that disease). The remaining disease associations were validated via text mining the literature on PubMed, and for each disease only one reference (shown by PubMed ID) was listed in the table due to space limitation.

| Rank | Code       | Disease name                                                      | $\phi$ -correlation | GWAS | Score           | Reference                |
|------|------------|-------------------------------------------------------------------|---------------------|------|-----------------|--------------------------|
| 1    | 239        | Neoplasms of unspecified nature                                   | 0.0030              | –    | 0.9877 (99.84%) | PMID: 22278152           |
| 2    | <b>331</b> | Other cerebral degenerations                                      | <b>0.0623</b>       | 0    | 0.9833 (99.38%) | ICD-9, Comorbidity       |
| 3    | 250        | Diabetes mellitus                                                 | -0.0032             | 0    | 0.9740 (98.63%) | PMID: 23335160           |
| 3    | 256        | Ovarian dysfunction                                               | 0.0003              | 0    | 0.9740 (98.63%) | PMID: 15351195           |
| 5    | 714        | Rheumatoid arthritis and other inflammatory polyarthropathies     | -0.0018             | 0    | 0.9739 (98.63%) | PMID: 18525447           |
| 5    | 155        | Malignant neoplasm of liver and intrahepatic bile ducts           | -0.0010             | 0    | 0.9739 (98.63%) | PMID: 24148818           |
| 7    | 290        | Dementias                                                         | <b>0.0843</b>       | 0    | 0.9725 (98.52%) | Comorbidity              |
| 8    | 202        | Other malignant neoplasms of lymphoid and histiocytic tissue      | -0.0024             | 1    | 0.9689 (98.29%) | GWAS                     |
| 9    | <b>335</b> | Anterior horn cell disease                                        | 0.0084              | 0    | 0.9666 (98.20%) | ICD-9                    |
| 9    | 758        | Chromosomal anomalies                                             | 0.0004              | –    | 0.9666 (98.20%) | PMID: 23162423           |
| 11   | 216        | Benign neoplasm of skin                                           | -0.0007             | –    | 0.9661 (98.13%) | –                        |
| 11   | 401        | Essential hypertension                                            | -0.0022             | 0    | 0.9661 (98.13%) | PMID: 9403584            |
| 11   | 642        | Hypertension complicating pregnancy childbirth and the puerperium | 0.0005              | –    | 0.9661 (98.13%) | –                        |
| 14   | 710        | Diffuse diseases of connective tissue                             | -0.0009             | 1    | 0.9645 (97.80%) | GWAS                     |
| 15   | <b>340</b> | Multiple sclerosis                                                | -0.0010             | 1    | 0.9552 (96.81%) | ICD-9, GWAS              |
| 16   | 300        | Anxiety, dissociative and somatoform disorders                    | 0.0216              | –    | 0.9442 (95.73%) | PMID: 20479358           |
| 16   | 301        | Personality disorders                                             | 0.0179              | –    | 0.9442 (95.73%) | PMID: 22083431           |
| 16   | 305        | Nondependent abuse of drugs                                       | -0.0082             | 0    | 0.9442 (95.73%) | PMID: 20443774           |
| 16   | 307        | Special symptoms or syndromes not elsewhere classified            | 0.0135              | 0    | 0.9442 (95.73%) | PMID: 18181204           |
| 20   | 277        | Other and unspecified disorders of metabolism                     | 0.0011              | 0    | 0.9424 (95.51%) | PMID: 21645034           |
| 21   | <b>365</b> | Glaucoma                                                          | 0.0068              | 0    | 0.9421 (95.50%) | ICD-9                    |
| 22   | 295        | Schizophrenic disorders                                           | 0.0337              | 1    | 0.9406 (95.46%) | GWAS                     |
| 22   | <b>333</b> | Other extrapyramidal disease and abnormal movement disorders      | <b>0.0708</b>       | 1    | 0.9406 (95.46%) | ICD-9, Comorbidity, GWAS |
| 24   | <b>362</b> | Other retinal disorders                                           | -0.0021             | 0    | 0.9356 (95.20%) | ICD-9                    |
| 25   | 577        | Diseases of pancreas                                              | -0.0023             | 0    | 0.9194 (94.47%) | PMID: 22745701           |
| 26   | 278        | Overweight, obesity and other hyperalimentation                   | -0.0094             | 0    | 0.9135 (94.21%) | PMID: 23175195           |
| 26   | 783        | Symptoms concerning nutrition metabolism and development          | 0.0175              | –    | 0.9135 (94.21%) | PMID: 17131227           |
| 28   | 414        | Other forms of chronic ischemic heart disease                     | 0.0013              | 2    | 0.9100 (93.95%) | GWAS                     |
| 28   | 733        | Other disorders of bone and cartilage                             | 0.0168              | 0    | 0.9100 (93.95%) | PMID: 23000281           |
| 30   | 042        | Human immunodeficiency virus [HIV] disease                        | -0.0008             | 0    | 0.9036 (93.29%) | PMID: 19748551           |

Table S5: List of the top 30 diseases associated with Parkinson’s disease (PD). The association scores (the sixth column, denoted by ‘Score’) were computed by using the topology-based measure and FunDO was used as the source of disease-gene associations. Only diseases annotated in all four disease-gene association datasets are listed in the table. For a disease associated with PD according to ICD-9, we highlighted its ICD-9 codes (the second column, denoted by ‘Code’) in bold and put ‘ICD-9’ as the reference (the last column). For a disease associated with PD according to comorbidity, we highlighted the  $\phi$ -correlation score in bold and put ‘comorbidity’ as the reference. For each disease, we listed the number of genes it shared with PD in the fifth column (‘-’ indicates that no GWAS studies have been conducted or no highly significant associations were collected in NHGRI GWAS catalog for that disease). The remaining disease associations were validated via text mining the literature on PubMed, and for each disease only one reference (shown by PubMed ID) was listed in the table due to space limitation. If a disease association haven’t been uncovered in the literature, it was marked with ‘-’ in the last column of the table.
